# Supplementary material for: Sleep apnoea is a risk factor for severe COVID-19
Source: PubMed Central journal article supplement — BMJ Open Respir Res. 2021 Jan 12;8(1):e000845. doi: 10.1136/bmjresp-2020-000845 (PMC7804843; doi:10.1136/bmjresp-2020-000845), 2021-01-12
Supplement: bmjresp-2020-000845supp001.pdf [file bmjresp-2020-000845supp001.pdf]

## Contributors of FinnGen

### Steering Committee

Aarno Palotie Institute for Molecular Medicine Finland, HiLIFE, University of Helsinki, Finland  
Mark Daly Institute for Molecular Medicine Finland, HiLIFE, University of Helsinki, Finland

### Pharmaceutical companies

Howard Jacob Abbvie, Chicago, IL, United States  
Athena Matakidou Astra Zeneca, Cambridge, United Kingdom  
Heiko Runz Biogen, Cambridge, MA, United States  
Sally John Biogen, Cambridge, MA, United States  
Robert Plenge Celgene, Summit, NJ, United States  
Mark McCarthy Genentech, San Francisco, CA, United States  
Julie Hunkapiller Genentech, San Francisco, CA, United States  
Meg Ehm GlaxoSmithKline, Brentford, United Kingdom  
Dawn Waterworth GlaxoSmithKline, Brentford, United Kingdom  
Caroline Fox Merck, Kenilworth, NJ, United States  
Anders Malarstig Pfizer, New York, NY, United States  
Kathy Klinger Sanofi, Paris, France  
Kathy Call Sanofi, Paris, France

### University of Helsinki & Biobanks

Tomi Mäkelä HiLIFE, University of Helsinki, Finland, Finland  
Jaakko Kaprio Institute for Molecular Medicine Finland, HiLIFE, Helsinki, Finland, Finland  
Petri Virolainen Auria Biobank / Univ. of Turku / Hospital District of Southwest Finland, Turku, Finland  
Kari Pulkki Auria Biobank / Univ. of Turku / Hospital District of Southwest Finland, Turku, Finland  
Terhi Kilpi THL Biobank / Finnish Institute for Health and Welfare Helsinki, Finland  
Markus Perola THL Biobank / Finnish Institute for Health and Welfare Helsinki, Finland  
Jukka Partanen Finnish Red Cross Blood Service / Finnish Hematology Registry and Clinical Biobank, Helsinki, Finland  
Anne Pitkäranta Hospital District of Helsinki and Uusimaa, Helsinki, Finland  
Riitta Kaarteenaho Northern Finland Biobank Borealis / University of Oulu / Northern Ostrobothnia Hospital District, Oulu, Finland  
Seppo Vainio Northern Finland Biobank Borealis / University of Oulu / Northern Ostrobothnia Hospital District, Oulu, Finland  
Kimmo Savinainen Finnish Clinical Biobank Tampere / University of Tampere / Pirkanmaa Hospital District, Tampere, Finland  
Veli-Matti Kosma Biobank of Eastern Finland / University of Eastern Finland / Northern Savo Hospital District, Kuopio, Finland  
Urho Kujala Central Finland Biobank / University of Jyväskylä / Central Finland Health Care

District, Jyväskylä, Finland

#### **Other Experts/ Non-Voting Members**

Outi Tuovila Business Finland, Helsinki, Finland  
 Minna Hendolin Business Finland, Helsinki, Finland  
 Raimo Pakkanen Business Finland, Helsinki, Finland

#### **Scientific Committee**

##### **Pharmaceutical companies**

Jeff Waring Abbvie, Chicago, IL, United States  
 Bridget Riley-Gillis Abbvie, Chicago, IL, United States  
 Athena Matakidou Astra Zeneca, Cambridge, United Kingdom  
 Heiko Runz Biogen, Cambridge, MA, United States  
 Jimmy Liu Biogen, Cambridge, MA, United States  
 Shameek Biswas Celgene, Summit, NJ, United States  
 Julie Hunkapiller Genentech, San Francisco, CA, United States  
 Dawn Waterworth GlaxoSmithKline, Brentford, United Kingdom  
 Meg Ehm GlaxoSmithKline, Brentford, United Kingdom

Dorothee Diogo Merck, Kenilworth, NJ, United States  
 Caroline Fox Merck, Kenilworth, NJ, United States  
 Anders Malarstig Pfizer, New York, NY, United States  
 Catherine Marshall Pfizer, New York, NY, United States  
 Xinli Hu Pfizer, New York, NY, United States  
 Kathy Call Sanofi, Paris, France  
 Kathy Klinger Sanofi, Paris, France  
 Matthias Gossel Sanofi, Paris, France

##### **University of Helsinki & Biobanks**

Samuli Ripatti Institute for Molecular Medicine Finland, HiLIFE, University of Helsinki, Helsinki, Finland  
 Johanna Schleutker Auria Biobank / Univ. of Turku / Hospital District of Southwest Finland, Turku, Finland  
 Markus Perola THL Biobank / Finnish Institute for Health and Welfare Helsinki, Finland  
 Mikko Arvas Finnish Red Cross Blood Service / Finnish Hematology Registry and Clinical Biobank, Helsinki, Finland  
 Olli Carpen Hospital District of Helsinki and Uusimaa, Helsinki, Finland  
 Reetta Hinttala Northern Finland Biobank Borealis / University of Oulu / Northern Ostrobothnia Hospital District, Oulu, Finland  
 Johannes Kettunen Northern Finland Biobank Borealis / University of Oulu / Northern Ostrobothnia Hospital District, Oulu, Finland  
 Reijo Laaksonen Finnish Clinical Biobank Tampere / University of Tampere / Pirkanmaa Hospital District, Tampere, Finland

|                |                                                                                                               |
|----------------|---------------------------------------------------------------------------------------------------------------|
| Arto Mannermaa | Biobank of Eastern Finland / University of Eastern Finland / Northern Savo Hospital District, Kuopio, Finland |
| Juha Paloneva  | Central Finland Biobank / University of Jyväskylä / Central Finland Health Care District, Jyväskylä, Finland  |
| Urho Kujala    | Central Finland Biobank / University of Jyväskylä / Central Finland Health Care District, Jyväskylä, Finland  |

#### Other Experts/ Non-Voting Members

|                |                                     |
|----------------|-------------------------------------|
| Outi Tuovila   | Business Finland, Helsinki, Finland |
| Minna Hendolin | Business Finland, Helsinki, Finland |
| Raimo Pakkanen | Business Finland, Helsinki, Finland |

#### Clinical Groups

##### Neurology Group

|                    |                                                              |
|--------------------|--------------------------------------------------------------|
| Hilkka Soinen      | Northern Savo Hospital District, Kuopio, Finland             |
| Valtteri Julkunen  | Northern Savo Hospital District, Kuopio, Finland             |
| Anne Remes         | Northern Ostrobothnia Hospital District, Oulu, Finland       |
| Reetta Kälviäinen  | Northern Savo Hospital District, Kuopio, Finland             |
| Mikko Hiltunen     | Northern Savo Hospital District, Kuopio, Finland             |
| Jukka Peltola      | Pirkanmaa Hospital District, Tampere, Finland                |
| Pentti Tienari     | Hospital District of Helsinki and Uusimaa, Helsinki, Finland |
| Juha Rinne         | Hospital District of Southwest Finland, Turku, Finland       |
| Adam Ziemann       | Abbvie, Chicago, IL, United States                           |
| Jeffrey Waring     | Abbvie, Chicago, IL, United States                           |
| Sahar Esmaeeli     | Abbvie, Chicago, IL, United States                           |
| Nizar Smaoui       | Abbvie, Chicago, IL, United States                           |
| Anne Lehtonen      | Abbvie, Chicago, IL, United States                           |
| Susan Eaton        | Biogen, Cambridge, MA, United States                         |
| Heiko Runz         | Biogen, Cambridge, MA, United States                         |
| Sanni Lahdenperä   | Biogen, Cambridge, MA, United States                         |
| Shameek Biswas     | Celgene, Summit, NJ, United States                           |
| John Michon        | Genentech, San Francisco, CA, United States                  |
| Geoff Kerchner     | Genentech, San Francisco, CA, United States                  |
| Julie Hunkapiller  | Genentech, San Francisco, CA, United States                  |
| Natalie Bowers     | Genentech, San Francisco, CA, United States                  |
| Edmond Teng        | Genentech, San Francisco, CA, United States                  |
| John Eicher        | Merck, Kenilworth, NJ, United States                         |
| Vinay Mehta        | Merck, Kenilworth, NJ, United States                         |
| Padhraig Gormley   | Merck, Kenilworth, NJ, United States                         |
| Kari Linden        | Pfizer, New York, NY, United States                          |
| Christopher Whelan | Pfizer, New York, NY, United States                          |
| Fanli Xu           | GlaxoSmithKline, Brentford, United Kingdom                   |

David Pulford                      GlaxoSmithKline, Brentford, United Kingdom

**Gastroenterology Group**

Martti Färkkilä                      Hospital District of Helsinki and Uusimaa, Helsinki, Finland  
Sampsa Pikkarainen                      Hospital District of Helsinki and Uusimaa, Helsinki, Finland  
Airi Jussila                              Pirkanmaa Hospital District, Tampere, Finland  
Timo Blomster                          Northern Ostrobothnia Hospital District, Oulu, Finland  
Mikko Kiviniemi                      Northern Savo Hospital District, Kuopio, Finland  
Markku Voutilainen                      Hospital District of Southwest Finland, Turku, Finland  
Bob Georgantas                          Abbvie, Chicago, IL, United States  
Graham Heap                              Abbvie, Chicago, IL, United States  
Jeffrey Waring                              Abbvie, Chicago, IL, United States  
Nizar Smaoui                              Abbvie, Chicago, IL, United States  
Fedik Rahimov                              Abbvie, Chicago, IL, United States  
Anne Lehtonen                              Abbvie, Chicago, IL, United States  
Keith Usiskin                              Celgene, Summit, NJ, United States  
Joseph Maranville                          Celgene, Summit, NJ, United States  
Tim Lu                                      Genentech, San Francisco, CA, United States  
Natalie Bowers                              Genentech, San Francisco, CA, United States  
Danny Oh                                      Genentech, San Francisco, CA, United States  
John Michon                                  Genentech, San Francisco, CA, United States  
Vinay Mehta                                  Merck, Kenilworth, NJ, United States  
Kirsi Kalpala                                  Pfizer, New York, NY, United States  
Melissa Miller                                  Pfizer, New York, NY, United States  
Xinli Hu                                      Pfizer, New York, NY, United States  
Linda McCarthy                              GlaxoSmithKline, Brentford, United Kingdom

**Rheumatology Group**

Kari Eklund                                  Hospital District of Helsinki and Uusimaa, Helsinki, Finland  
Antti Palomäki                              Hospital District of Southwest Finland, Turku, Finland  
Pia Isomäki                                  Pirkanmaa Hospital District, Tampere, Finland  
Laura Pirilä                                  Hospital District of Southwest Finland, Turku, Finland  
Oili Kaipainen-Seppänen                      Northern Savo Hospital District, Kuopio, Finland  
Johanna Huhtakangas                          Northern Ostrobothnia Hospital District, Oulu, Finland  
Bob Georgantas                              Abbvie, Chicago, IL, United States  
Jeffrey Waring                              Abbvie, Chicago, IL, United States  
Fedik Rahimov                              Abbvie, Chicago, IL, United States  
Apinya Lertratanakul                          Abbvie, Chicago, IL, United States  
Nizar Smaoui                              Abbvie, Chicago, IL, United States  
Anne Lehtonen                              Abbvie, Chicago, IL, United States  
David Close                                  Astra Zeneca, Cambridge, United Kingdom  
Marla Hochfeld                              Celgene, Summit, NJ, United States

Natalie Bowers Genentech, San Francisco, CA, United States  
John Michon Genentech, San Francisco, CA, United States  
Dorothee Diogo Merck, Kenilworth, NJ, United States  
Vinay Mehta Merck, Kenilworth, NJ, United States  
Kirsi Kalpala Pfizer, New York, NY, United States  
Nan Bing Pfizer, New York, NY, United States  
Xinli Hu Pfizer, New York, NY, United States  
Jorge Esparza Gordillo GlaxoSmithKline, Brentford, United Kingdom  
Nina Mars Institute for Molecular Medicine Finland, HiLIFE, University of Helsinki, Helsinki, Finland

### **Pulmonology Group**

Tarja Laitinen Pirkanmaa Hospital District, Tampere, Finland  
Margit Pelkonen Northern Savo Hospital District, Kuopio, Finland  
Paula Kauppi Hospital District of Helsinki and Uusimaa, Helsinki, Finland  
Hannu Kankaanranta Pirkanmaa Hospital District, Tampere, Finland  
Terttu Harju Northern Ostrobothnia Hospital District, Oulu, Finland  
Nizar Smaoui Abbvie, Chicago, IL, United States  
David Close Astra Zeneca, Cambridge, United Kingdom

Steven Greenberg Celgene, Summit, NJ, United States  
Hubert Chen Genentech, San Francisco, CA, United States  
Natalie Bowers Genentech, San Francisco, CA, United States  
John Michon Genentech, San Francisco, CA, United States  
Vinay Mehta Merck, Kenilworth, NJ, United States  
Jo Betts GlaxoSmithKline, Brentford, United Kingdom  
Soumitra Ghosh GlaxoSmithKline, Brentford, United Kingdom

### **Cardiometabolic Diseases Group**

Veikko Salomaa Finnish Institute for Health and Welfare Helsinki, Finland  
Teemu Niiranen Finnish Institute for Health and Welfare Helsinki, Finland  
Markus Juonala Hospital District of Southwest Finland, Turku, Finland  
Kaj Metsärinne Hospital District of Southwest Finland, Turku, Finland  
Mika Kähönen Pirkanmaa Hospital District, Tampere, Finland  
Juhani Junttila Northern Ostrobothnia Hospital District, Oulu, Finland  
Markku Laakso Northern Savo Hospital District, Kuopio, Finland  
Jussi Pihlajamäki Northern Savo Hospital District, Kuopio, Finland  
Juha Sinisalo Hospital District of Helsinki and Uusimaa, Helsinki, Finland  
Marja-Riitta Taskinen Hospital District of Helsinki and Uusimaa, Helsinki, Finland  
Tiinamaija Tuomi Hospital District of Helsinki and Uusimaa, Helsinki, Finland  
Jari Laukkanen Central Finland Health Care District, Jyväskylä, Finland  
Ben Challis Astra Zeneca, Cambridge, United Kingdom  
Andrew Peterson Genentech, San Francisco, CA, United States

Julie Hunkapiller Genentech, San Francisco, CA, United States  
Natalie Bowers Genentech, San Francisco, CA, United States  
John Michon Genentech, San Francisco, CA, United States  
Dorothee Diogo Merck, Kenilworth, NJ, United States  
Audrey Chu Merck, Kenilworth, NJ, United States  
Vinay Mehta Merck, Kenilworth, NJ, United States  
Jaakko Parkkinen Pfizer, New York, NY, United States  
Melissa Miller Pfizer, New York, NY, United States  
Anthony Muslin Sanofi, Paris, France  
Dawn Waterworth GlaxoSmithKline, Brentford, United Kingdom

**Oncology Group**

Heikki Joensuu Hospital District of Helsinki and Uusimaa, Helsinki, Finland  
Tuomo Meretoja Hospital District of Helsinki and Uusimaa, Helsinki, Finland  
Olli Carpen Hospital District of Helsinki and Uusimaa, Helsinki, Finland  
Lauri Aaltonen Hospital District of Helsinki and Uusimaa, Helsinki, Finland  
Annika Auranen Pirkanmaa Hospital District, Tampere, Finland  
Peeter Karihtala Northern Ostrobothnia Hospital District, Oulu, Finland  
Saila Kauppila Northern Ostrobothnia Hospital District, Oulu, Finland  
Päivi Auvinen Northern Savo Hospital District, Kuopio, Finland  
Klaus Elenius Hospital District of Southwest Finland, Turku, Finland  
Relja Popovic Abbvie, Chicago, IL, United States  
Jeffrey Waring Abbvie, Chicago, IL, United States  
Bridget Riley-Gillis Abbvie, Chicago, IL, United States  
Anne Lehtonen Abbvie, Chicago, IL, United States  
Athena Matakidou Astra Zeneca, Cambridge, United Kingdom  
Jennifer Schutzman Genentech, San Francisco, CA, United States  
Julie Hunkapiller Genentech, San Francisco, CA, United States  
Natalie Bowers Genentech, San Francisco, CA, United States  
John Michon Genentech, San Francisco, CA, United States  
Vinay Mehta Merck, Kenilworth, NJ, United States  
Andrey Loboda Merck, Kenilworth, NJ, United States  
Aparna Chhibber Merck, Kenilworth, NJ, United States  
Heli Lehtonen Pfizer, New York, NY, United States  
Stefan McDonough Pfizer, New York, NY, United States  
Marika Crohns Sanofi, Paris, France  
Diptee Kulkarni GlaxoSmithKline, Brentford, United Kingdom

**Ophthalmology Group**

Kai Kaarniranta Northern Savo Hospital District, Kuopio, Finland  
Joni Turunen Hospital District of Helsinki and Uusimaa, Helsinki, Finland  
Terhi Ollila Hospital District of Helsinki and Uusimaa, Helsinki, Finland  
Sanna Seitsonen Hospital District of Helsinki and Uusimaa, Helsinki, Finland

Hannu Uusitalo Pirkanmaa Hospital District, Tampere, Finland  
Vesa Aaltonen Hospital District of Southwest Finland, Turku, Finland  
Hannele Uusitalo-Järvinen Pirkanmaa Hospital District, Tampere, Finland  
Marja Luodonpää Northern Ostrobothnia Hospital District, Oulu, Finland  
Nina Hautala Northern Ostrobothnia Hospital District, Oulu, Finland  
Heiko Runz Biogen, Cambridge, MA, United States  
Erich Strauss Genentech, San Francisco, CA, United States  
Natalie Bowers Genentech, San Francisco, CA, United States  
Hao Chen Genentech, San Francisco, CA, United States  
John Michon Genentech, San Francisco, CA, United States  
Anna Podgornaia Merck, Kenilworth, NJ, United States  
Vinay Mehta Merck, Kenilworth, NJ, United States  
Dorothee Diogo Merck, Kenilworth, NJ, United States  
Joshua Hoffman GlaxoSmithKline, Brentford, United Kingdom

#### **Dermatology Group**

Kaisa Tasanen Northern Ostrobothnia Hospital District, Oulu, Finland  
Laura Huilaja Northern Ostrobothnia Hospital District, Oulu, Finland  
Katariina Hannula-Jouppi Hospital District of Helsinki and Uusimaa, Helsinki, Finland  
Teea Salmi Pirkanmaa Hospital District, Tampere, Finland  
Sirkku Peltonen Hospital District of Southwest Finland, Turku, Finland  
Leena Koulu Hospital District of Southwest Finland, Turku, Finland  
Ilkka Harvima Northern Savo Hospital District, Kuopio, Finland  
Kirsi Kalpala Pfizer, New York, NY, United States  
Ying Wu Pfizer, New York, NY, United States  
David Choy Genentech, San Francisco, CA, United States  
John Michon Genentech, San Francisco, CA, United States  
Nizar Smaoui Abbvie, Chicago, IL, United States  
Fedik Rahimov Abbvie, Chicago, IL, United States  
Anne Lehtonen Abbvie, Chicago, IL, United States  
Dawn Waterworth GlaxoSmithKline, Brentford, United Kingdom

#### **FinnGen Teams**

##### **Administration Team**

Anu Jalanko Institute for Molecular Medicine Finland, HiLIFE, University of Helsinki, Finland  
Risto Kajanne Institute for Molecular Medicine Finland, HiLIFE, University of Helsinki, Finland  
Ulrike Lyhs Institute for Molecular Medicine Finland, HiLIFE, University of Helsinki, Finland

**Communication**

Mari Kaunisto Institute for Molecular Medicine Finland, HiLIFE, University of Helsinki, Finland

**Analysis Team**

Justin Wade Davis Abbvie, Chicago, IL, United States  
 Bridget Riley-Gillis Abbvie, Chicago, IL, United States  
 Danjuma Quarless Abbvie, Chicago, IL, United States  
 Slavé Petrovski Astra Zeneca, Cambridge, United Kingdom  
 Jimmy Liu Biogen, Cambridge, MA, United States  
 Chia-Yen Chen Biogen, Cambridge, MA, United States  
 Paola Bronson Biogen, Cambridge, MA, United States  
 Robert Yang Celgene, Summit, NJ, United States  
 Joseph Maranville Celgene, Summit, NJ, United States  
 Shameek Biswas Celgene, Summit, NJ, United States  
 Diana Chang Genentech, San Francisco, CA, United States  
 Julie Hunkapiller Genentech, San Francisco, CA, United States  
 Tushar Bhargale Genentech, San Francisco, CA, United States  
 Natalie Bowers Genentech, San Francisco, CA, United States  
 Dorothee Diogo Merck, Kenilworth, NJ, United States  
 Emily Holzinger Merck, Kenilworth, NJ, United States  
 Padhraig Gormley Merck, Kenilworth, NJ, United States

Xulong Wang Merck, Kenilworth, NJ, United States  
 Xing Chen Pfizer, New York, NY, United States  
 Åsa Hedman Pfizer, New York, NY, United States  
 Kirsi Auro GlaxoSmithKline, Brentford, United Kingdom  
 Clarence Wang Sanofi, Paris, France  
 Ethan Xu Sanofi, Paris, France  
 Franck Auge Sanofi, Paris, France  
 Clement Chatelain Sanofi, Paris, France  
 Mitja Kurki Institute for Molecular Medicine Finland, HiLIFE, University of Helsinki, Finland  
 / Broad Institute, Cambridge, MA, United States

Samuli Ripatti Institute for Molecular Medicine Finland, HiLIFE, University of Helsinki, Finland  
 Mark Daly Institute for Molecular Medicine Finland, HiLIFE, University of Helsinki, Finland  
 Juha Karjalainen Institute for Molecular Medicine Finland, HiLIFE, University of Helsinki, Finland  
 / Broad Institute, Cambridge, MA, United States

Aki Havulinna Institute for Molecular Medicine Finland, HiLIFE, University of Helsinki, Finland  
 Anu Jalanko Institute for Molecular Medicine Finland, HiLIFE, University of Helsinki, Finland  
 Kimmo Palin University of Helsinki, Helsinki, Finland  
 Priit Palta Institute for Molecular Medicine Finland, HiLIFE, University of Helsinki, Finland  
 Pietro Della Briotta Parolo Institute for Molecular Medicine Finland, HiLIFE, University of Helsinki,  
 Finland



|                           |                                                                                                                    |
|---------------------------|--------------------------------------------------------------------------------------------------------------------|
| Wei Zhou                  | Broad Institute, Cambridge, MA, United States                                                                      |
| Susanna Lemmelä           | Institute for Molecular Medicine Finland, HiLIFE, University of Helsinki, Finland                                  |
| Manuel Rivas              | University of Stanford, Stanford, CA, United States                                                                |
| Jarmo Harju               | Institute for Molecular Medicine Finland, HiLIFE, University of Helsinki, Finland                                  |
| Aarno Palotie<br>Finland  | Institute for Molecular Medicine Finland, HiLIFE, University of Helsinki,                                          |
| Arto Lehisto              | Institute for Molecular Medicine Finland, HiLIFE, University of Helsinki, Finland                                  |
| Andrea Ganna              | Institute for Molecular Medicine Finland, HiLIFE, University of Helsinki, Finland                                  |
| Vincent Llorens           | Institute for Molecular Medicine Finland, HiLIFE, University of Helsinki, Finland                                  |
| Antti Karlsson<br>Finland | Auria Biobank / Univ. of Turku / Hospital District of Southwest Finland, Turku,                                    |
| Kati Kristiansson         | THL Biobank / Finnish Institute for Health and Welfare Helsinki, Finland                                           |
| Mikko Arvas               | Finnish Red Cross Blood Service / Finnish Hematology Registry and Clinical<br>Biobank, Helsinki, Finland           |
| Kati Hyvärinen            | Finnish Red Cross Blood Service / Finnish Hematology Registry and Clinical<br>Biobank, Helsinki, Finland           |
| Jarmo Ritari              | Finnish Red Cross Blood Service / Finnish Hematology Registry and Clinical<br>Biobank, Helsinki, Finland           |
| Tiina Wahlfors            | Finnish Red Cross Blood Service / Finnish Hematology Registry and Clinical<br>Biobank, Helsinki, Finland           |
| Miika Koskinen            | Hospital District of Helsinki and Uusimaa, Helsinki, Finland BB/HUS/Univ Hosp<br>Districts                         |
| Olli Carpen               | Hospital District of Helsinki and Uusimaa, Helsinki, Finland BB/HUS/Univ Hosp<br>Districts                         |
| Johannes Kettunen         | Northern Finland Biobank Borealis / University of Oulu / Northern Ostrobothnia<br>Hospital District, Oulu, Finland |
| Katri Pylkäs              | Northern Finland Biobank Borealis / University of Oulu / Northern Ostrobothnia<br>Hospital District, Oulu, Finland |
| Marita Kalaoja            | Northern Finland Biobank Borealis / University of Oulu / Northern Ostrobothnia<br>Hospital District, Oulu, Finland |
| Minna Karjalainen         | Northern Finland Biobank Borealis / University of Oulu / Northern Ostrobothnia<br>Hospital District, Oulu, Finland |
| Tuomo Mantere             | Northern Finland Biobank Borealis / University of Oulu / Northern Ostrobothnia<br>Hospital District, Oulu, Finland |
| Eeva Kangasniemi          | Finnish Clinical Biobank Tampere / University of Tampere / Pirkanmaa Hospital<br>District, Tampere, Finland        |
| Sami Heikkinen            | Biobank of Eastern Finland / University of Eastern Finland / Northern Savo<br>Hospital District, Kuopio, Finland   |
| Arto Mannermaa            | Biobank of Eastern Finland / University of Eastern Finland / Northern Savo Hospital<br>District, Kuopio, Finland   |
| Eija Laakkonen            | Central Finland Biobank / University of Jyväskylä / Central Finland Health Care<br>District, Jyväskylä, Finland    |
| Juha Kononen              | Central Finland Biobank / University of Jyväskylä / Central Finland Health Care                                    |

District, Jyväskylä, Finland

### Sample Collection Coordination

Anu Loukola Hospital District of Helsinki and Uusimaa, Helsinki, Finland

### Sample Logistics

Päivi Laiho THL Biobank / Finnish Institute for Health and Welfare Helsinki, Finland  
Tuuli Sistonen THL Biobank / Finnish Institute for Health and Welfare Helsinki, Finland  
Essi Kaiharju THL Biobank / Finnish Institute for Health and Welfare Helsinki, Finland  
Markku Laukkanen THL Biobank / Finnish Institute for Health and Welfare Helsinki, Finland  
Elina Järvensivu THL Biobank / Finnish Institute for Health and Welfare Helsinki, Finland  
Sini Lähteenmäki THL Biobank / Finnish Institute for Health and Welfare Helsinki, Finland  
Lotta Männikkö THL Biobank / Finnish Institute for Health and Welfare Helsinki, Finland  
Regis Wong THL Biobank / Finnish Institute for Health and Welfare Helsinki, Finland

### Registry Data Operations

Kati Kristiansson THL Biobank / Finnish Institute for Health and Welfare Helsinki, Finland  
Hannele Mattsson THL Biobank / Finnish Institute for Health and Welfare Helsinki, Finland  
Susanna Lemmelä Institute for Molecular Medicine Finland, HiLIFE, University of Helsinki, Finland  
Tero Hiekkalinna THL Biobank / Finnish Institute for Health and Welfare Helsinki, Finland  
Manuel González Jiménez. THL Biobank / Finnish Institute for Health and Welfare Helsinki, Finland

### Genotyping

Kati Donner Institute for Molecular Medicine Finland, HiLIFE, University of Helsinki, Finland

### Sequencing Informatics

Priit Palta Institute for Molecular Medicine Finland, HiLIFE, University of Helsinki, Finland  
Kalle Pärn Institute for Molecular Medicine Finland, HiLIFE, University of Helsinki, Finland  
Javier Nunez-Fontarnau Institute for Molecular Medicine Finland, HiLIFE, University of Helsinki, Finland

### Data Management and IT Infrastructure

Jarmo Harju Institute for Molecular Medicine Finland, HiLIFE, University of Helsinki, Finland  
Elina Kilpeläinen Institute for Molecular Medicine Finland, HiLIFE, University of Helsinki, Finland  
Timo P. Sipilä Institute for Molecular Medicine Finland, HiLIFE, University of Helsinki, Finland  
Georg Brein Institute for Molecular Medicine Finland, HiLIFE, University of Helsinki, Finland  
Alexander Dada Institute for Molecular Medicine Finland, HiLIFE, University of Helsinki, Finland  
Ghazal Awaisa Institute for Molecular Medicine Finland, HiLIFE, University of Helsinki, Finland  
Anastasia Shcherban Institute for Molecular Medicine Finland, HiLIFE, University of Helsinki, Finland  
Tuomas Sipilä Institute for Molecular Medicine Finland, HiLIFE, University of Helsinki, Finland

**Clinical Endpoint Development**

|                  |                                                                                   |
|------------------|-----------------------------------------------------------------------------------|
| Hannele Laivuori | Institute for Molecular Medicine Finland, HiLIFE, University of Helsinki, Finland |
| Aki Havulinna    | Institute for Molecular Medicine Finland, HiLIFE, University of Helsinki, Finland |
| Susanna Lemmelä  | Institute for Molecular Medicine Finland, HiLIFE, University of Helsinki, Finland |
| Tuomo Kiiskinen  | Institute for Molecular Medicine Finland, HiLIFE, University of Helsinki, Finland |

**Trajectory Team**

|                        |                                               |
|------------------------|-----------------------------------------------|
| Tarja Laitinen         | Pirkanmaa Hospital District, Tampere, Finland |
| Harri Siirtola         | University of Tampere, Tampere, Finland       |
| Javier Gracia Tabuenca | University of Tampere, Tampere, Finland       |

**Biobank Directors**

|                  |                                                  |
|------------------|--------------------------------------------------|
| Lila Kallio      | Auria Biobank, Turku, Finland                    |
| Sirpa Soini      | THL Biobank, Helsinki, Finland                   |
| Jukka Partanen   | Blood Service Biobank, Helsinki, Finland         |
| Kimmo Pitkänen   | Helsinki Biobank, Helsinki, Finland              |
| Seppo Vainio     | Northern Finland Biobank Borealis, Oulu, Finland |
| Kimmo Savinainen | Tampere Biobank, Tampere, Finland                |
| Veli-Matti Kosma | Biobank of Eastern Finland, Kuopio, Finland      |
| Teijo Kuopio     | Central Finland Biobank, Jyväskylä, Finland      |

Supplementary Table 1. The prospective epidemiological and disease-based cohorts, and hospital biobank samples in FinnGen Data Freeze 6

| <b>Cohort</b>              | <b>N</b>      |
|----------------------------|---------------|
| Auria Biobank              | 29201         |
| Biobank of Central Finland | 7743          |
| Biobank of Eastern Finland | 7765          |
| Blood Service Biobank      | 28901         |
| Borealis Biobank           | 7390          |
| Biobank Botnia             | 8681          |
| Biobank Corogene           | 4689          |
| Biobank FinHealth          | 5928          |
| Helsinki Biobank           | 58693         |
| Tampere Biobank            | 12394         |
| Terveystalo Biobank        | 1709          |
| THL Biobank ATBC           | 3836          |
| THL Biobank FinIPF         | 201           |
| THL Biobank FINRISK 1992   | 4931          |
| THL Biobank FINRISK 1997   | 6997          |
| THL Biobank FINRISK 2002   | 6869          |
| THL Biobank FINRISK 2007   | 5143          |
| THL Biobank FINRISK 2012   | 5233          |
| THL Biobank GENERISK       | 6898          |
| THL Biobank Health 2000    | 6529          |
| THL Biobank Health 2011    | 708           |
| THL Biobank HHS            | 2113          |
| THL Biobank Kuusamo        | 123           |
| THL Biobank Migraine       | 7717          |
| THL Biobank SUPER          | 8466          |
| THL Biobank Diabetes       | 10145         |
| THL Biobank Twins          | 11402         |
| <b>Total:</b>              | <b>260405</b> |

THL= Finnish Institute for Health and Welfare Helsinki, Finland

Supplementary Table 2. ICD-codes for OSA and comorbidities

|                     | <b>ICD-10</b>       | <b>ICD-9</b>                                                  | <b>ICD-8</b>            |
|---------------------|---------------------|---------------------------------------------------------------|-------------------------|
| <b>OSA</b>          | G47.3               | 3472                                                          |                         |
| <b>HYPERTENSION</b> | I10-I13, I15, I67.4 | 4019X, 4029A, 4029B, 4039A, 4040A, 4059A, 4059B, 4372A, 4059X | 400, 401, 402, 403, 404 |
| <b>DIABETES</b>     | E10-E14             | 250                                                           | 250                     |
| <b>CHD</b>          | I20.0, I21, I22     | 410, 4110                                                     | 410, 411,0              |
| <b>ASTHMA</b>       | J45, J46            | 493                                                           | 493                     |
| <b>COPD</b>         | J43, J44            | 492, 4912                                                     | 492, 491,04             |

By combining codes from different registries, we generate phenotype endpoints. Finnish national version for each International Statistical Classification of Diseases (ICD)-codes were used. These ICD-code criteria are all regular expressions for a hierarchical search. OSA=obstructive sleep apnoea, CHD=coronary heart disease.
